# Supplementary material
Source: PubMed Central journal article supplement (PMC4775740)

**Figure 5**

**A**

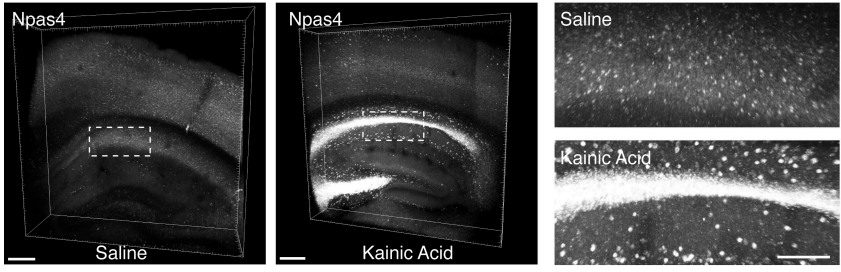

**B**

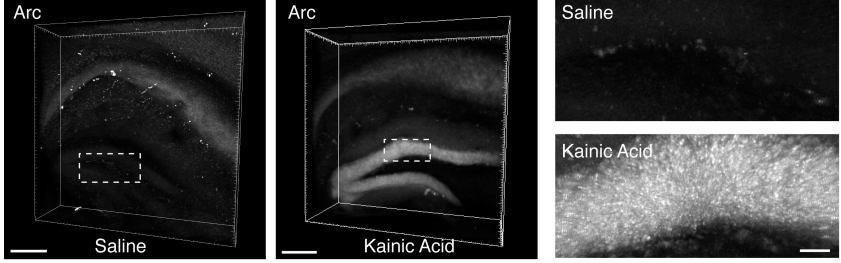

**C**

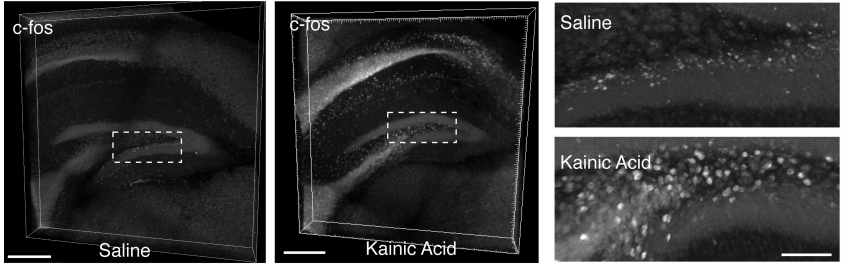

**D**

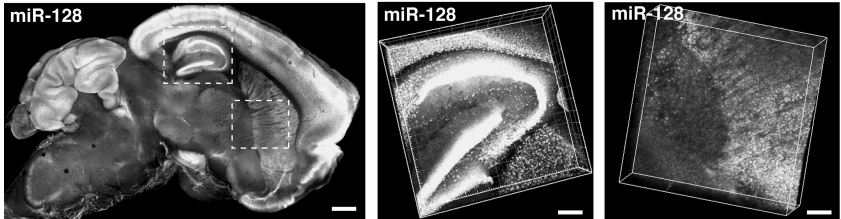

**E**

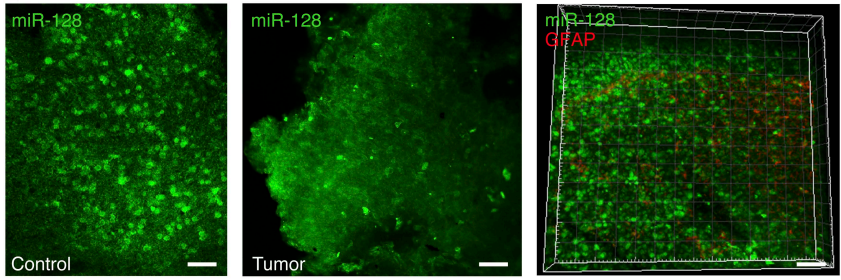

Supplement: NIHMS756135-supplement-1.pdf [file NIHMS756135-supplement-1.pdf]
